# Supplementary material for: Zn-modified ceria as a redox material for thermochemical H2O and CO2 splitting: effect of a secondary ZnO phase on its thermochemical activity
Source: Royal Society of Chemistry journal article supplement (doi:10.1039/c6ce00430j), 2016-01-01
Supplement: c6ce00430j1.pdf [file c6ce00430j1.pdf]

## Electronic Supplementary Information (ESI)

### Zn-modified ceria as a redox material for thermochemical $\text{H}_2\text{O}$ and $\text{CO}_2$ splitting: effect of a secondary ZnO phase on its thermochemical activity†

Fangjian Lin,<sup>a</sup> Vallerie A. Samson,<sup>b</sup> Andrea O. Wismer,<sup>a</sup> Daniel Grolimund,<sup>b</sup> Ivo Alxneit<sup>\*a</sup> and Alexander Wokaun<sup>c</sup>

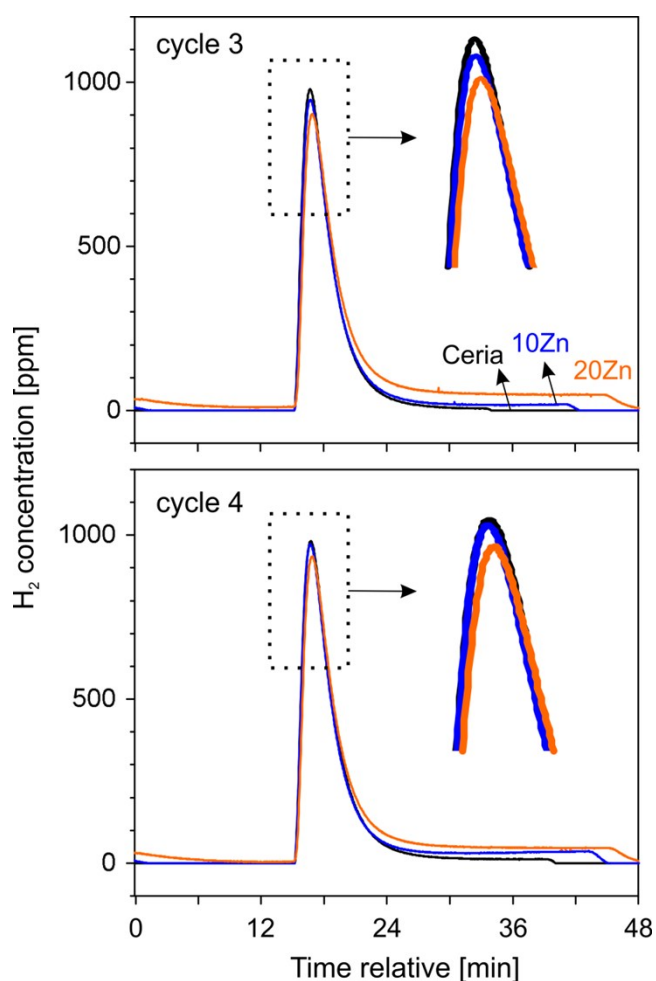

**Fig. S1**  $\text{H}_2$  evolution profiles of native ceria (black line), 10Zn (blue line) and 20Zn (orange line) during reoxidation of the 3<sup>rd</sup> and 4<sup>th</sup>  $\text{H}_2\text{O}$ -splitting cycles at 1000 °C, illustrating a slower reoxidation of Zn-modified ceria compared to native ceria.

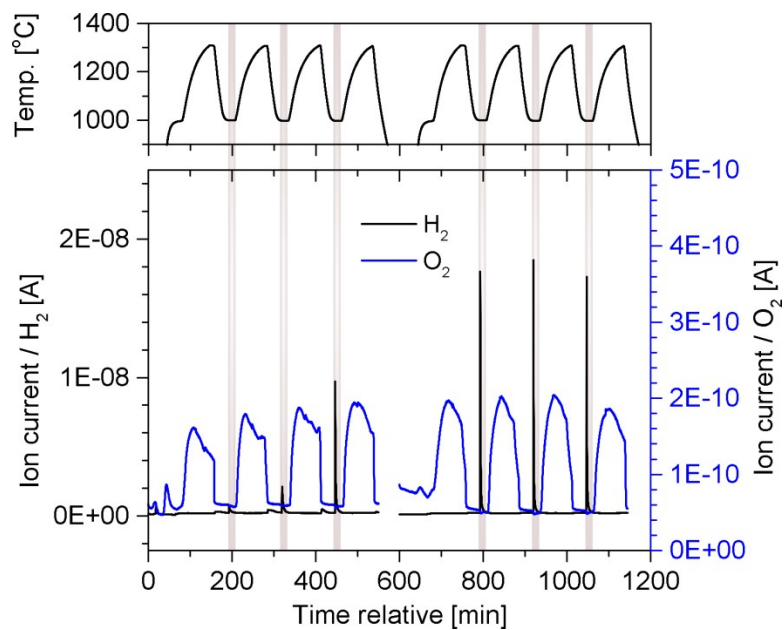

**Fig. S2.** Ion current profiles of  $O_2$  and  $H_2$  for 6  $H_2O$ -splitting cycles using 20Zn. The reoxidation periods are marked by grey strips.

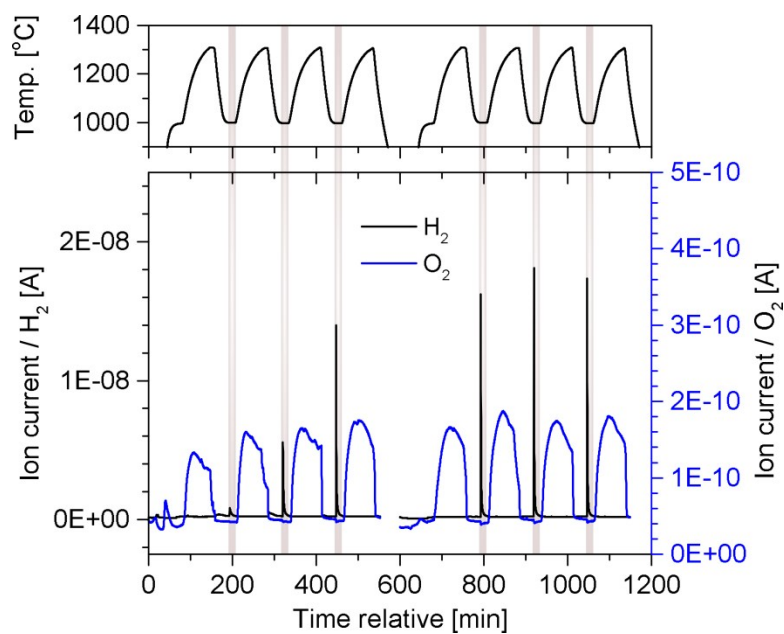

**Fig. S3.** Ion current profiles of  $O_2$  and  $H_2$  for 6  $H_2O$ -splitting cycles using 10Zn. The reoxidation periods are marked by grey strips.

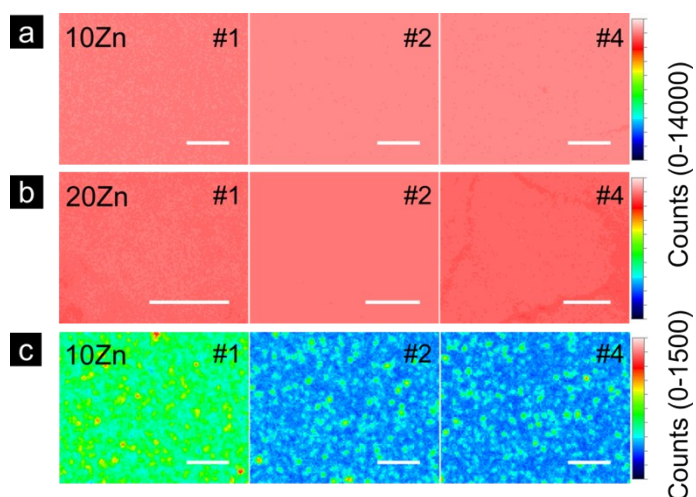

**Fig. S4.** Lab XRF cerium maps of (a) 10Zn and (b) 20Zn after 1, 2 and 4 H<sub>2</sub>O-splitting cycles, plotted in the same color scale. The maps show a homogeneous distribution of cerium. The scale bars in all maps represent a length of 500  $\mu\text{m}$ . The zinc maps of 10Zn, plotted in a smaller scale than in Fig. 4c, are presented in (c).

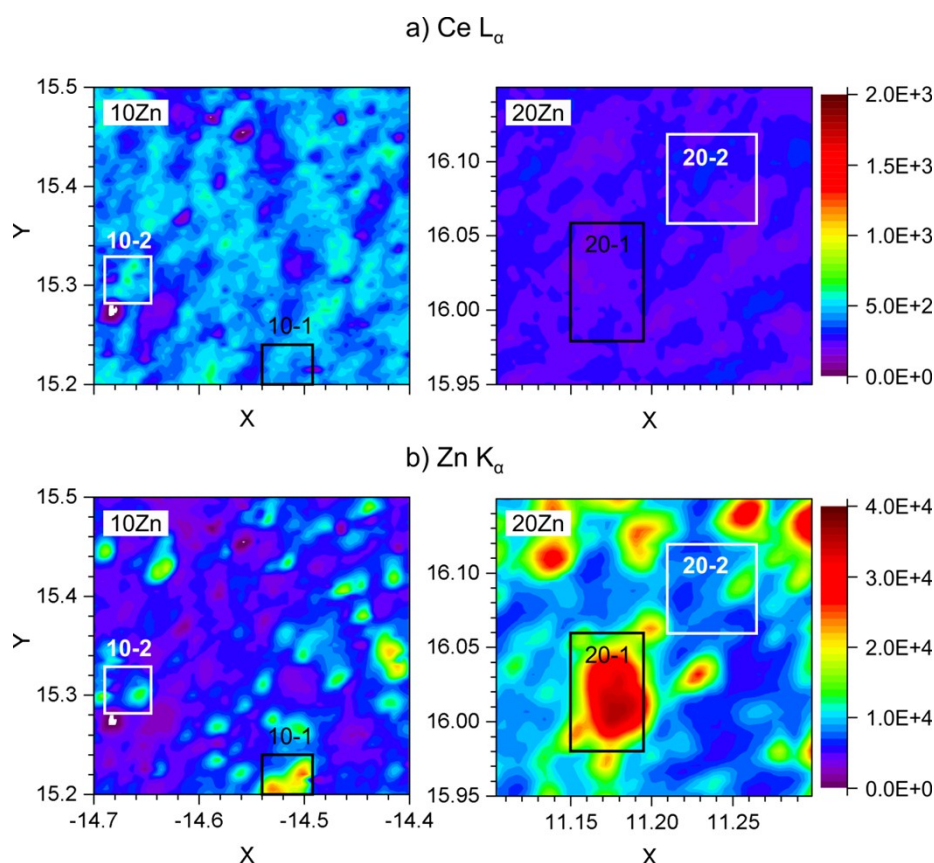

**Fig. S5.** Synchrotron-based XRF overview maps (X, Y coordinates in millimeter) of 10Zn (left) and 20Zn (right) after 4 H<sub>2</sub>O-splitting cycles: a) cerium maps, b) zinc maps. Regions marked with “10-1” and “10-2” represent a Zn-rich and a Ce-rich region, respectively for 10Zn. Likewise, regions marked with “20-1” and “20-2” represent a Zn-rich and a Ce-rich region for 20Zn, respectively. These four regions are further mapped with higher spatial resolution and dwell time, with the results shown in the insets of Fig. 5.

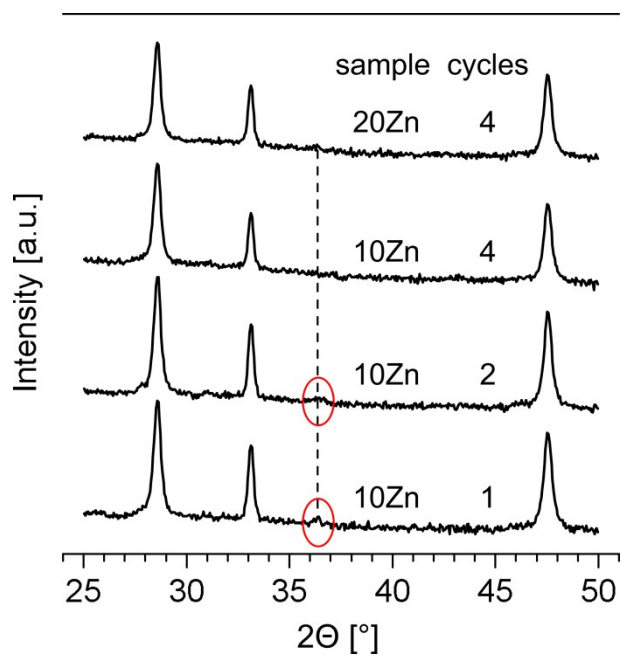

**Fig. S6.** XRD patterns, obtained conventional X-ray, of 10Zn and 20Zn subjected to multiple H<sub>2</sub>O-splitting cycles (intensity in logarithmic scale). ZnO is detected in samples subjected to one or two cycles, with marked peaks corresponding to wurzite ZnO (101).
